# Supplementary material
Source: publisher figshare collection journal article supplement (https://tandf.figshare.com/ndownloader/files/15102731)
Supplement: Supplementary file 1 [file 15102731]

**SUPPLEMENTARY DATA**

Snehalata B. Autade, Krishnacharya G. Akamanchi*

*Department of Pharmaceutical Sciences and Technology, Institute of Chemical Technology, Matunga, Mumbai, 400019, India.

E-mail address: [kg.akamanchi@ictmumbai.edu.in](mailto:kg.akamanchi@ictmumbai.edu.in), [kgap@reddifmail.com](mailto:kgap@reddifmail.com) (K. G. Akamanchi)

**Contents**

1. **General methods**
2. **Preparation of Sulfated tungstate**
3. **General experimental procedure**
4. **Spectral data**
5. **1H NMR and 13C NMR Spectra**
6. **IR Spectra**
7. **References**

**1. General methods**

All chemicals used were of reagent grade and used as received without further purification. All 1H NMR and 13C-NMRspectra were recorded on Agilent FT-NMR System 400 MHz. Chemical shift values are expressed in *δ* units relative to tetramethylsilane (TMS) signal as an internal reference standard in CDCl3. Melting points were recorded on THERMONIK-Campbell Melting Point apparatus-Instrument having an oil heating system with stirring and are uncorrected. Purification of compounds was carried out by column chromatography using Silica gel #60-120 as stationary phase.

**2. Preparation of Sulfated tungstate:** Prepared as per the reported procedure[1](#_ENREF_1)

**3. General experimental procedure for the synthesis of 4‑Aryl-*NH*-1,2,3-triazoles**

To a stirred solution of arylnitrostyrenes 1 (1 mmol) and sulfated tungstate (10 wt%) in DMF (2 mL) NaN3 (1.2 mmol) was added and the mixture was stirred at 60°C for 1 h. Progress of the reaction was monitored by TLC. After completion of reaction, reaction mixture was cooled down to rt. Then the mixture was diluted by adding ethyl acetate (10 ml) with stirring. Filtered off the catalyst. The filtrate was washed with 10 mL of water, organic layer was dried over Na2SO4 and concentrated under reduced pressure. The crude product was purified by column chromatography on silica gel (100-200 mesh) and petroleum ether/EtOAc mixture as an eluent to afford pure product 4‑Aryl-*NH*-1,2,3-triazoles.

.

**4. Spectral data**

**4-phenyl-1H-1,2,3-triazole (2a)**[2]

White solid, Isolated yield = 95 %, mp =150-151 °C (Lit149-151 °C )

**1H NMR** (400 MHz, DMSO-d6) δ 8.07 (s, 1H), 7.86 (d, *J* = 7.5 Hz, 2H), 7.49 (t, *J* = 7.5 Hz, 2H), 7.43 (d, *J* = 7.3 Hz, 1H), 7.29 (s, 1H). **13C NMR** (101 MHz, DMSO-d6) δ 167.77 (s), 133.30 (s), 131.19 (s), 129.71 (s), 129.37 (s), 129.01 (s), 126.01 (s).

**4-(4-bromophenyl)-1H-1,2,3-triazole (2b)**[3]

White solid, Isolated yield = 88 %, mp =178-179 °C (Lit177.5-178.3°C )

**1H NMR** (400 MHz, DMSO-d6) δ 8.29 (s, 1H), 7.82 (d, *J* = 8.0 Hz, 2H), 7.65 (d, *J* = 8.1 Hz, 2H).

**4-(4-chlorophenyl)-1H-1,2,3-triazole (2c)**[2]

White solid, Isolated yield = 92 %, mp =151-152 °C (Lit150-152 °C )

**1H NMR** (400 MHz, DMSO-d6) δ 8.32 (s, 1H), 7.84 (d, *J* = 8.5 Hz, 2H), 7.43 (d, *J* = 8.5 Hz, 2H). **13C NMR** (101 MHz, DMSO-d6) δ 174.97 (s), 132.99 (s), 129.33 (s), 129.26 (s), 128.86 (s), 127.60 (s).

**4-(4-fluorophenyl)-1H-1,2,3-triazole (2d)**[3]

Yellow solid, Isolated yield = 90 %, mp =172-173°C (Lit172.1-172.5°C )

**1H NMR** (400 MHz, DMSO-d6) δ 8.30 (s, 1H), 7.90 (s, 2H), 7.28 (t, *J* = 7.7 Hz, 2H). **13C NMR** (101 MHz, DMSO-d6) δ 163.33 (s), 161.38 (s), 128.04 (s), 116.29 (s).

**4-(2,4-dichlorophenyl)-1H-1,2,3-triazole (2e)**[4]

White solid, Isolated yield = 91 %, mp =170-171°C (Lit168-171)

**1H NMR** (400 MHz, DMSO-d6) δ 8.35 (s, 1H), 7.92 (s, 1H), 7.70 (s, 1H), 7.49 (d, *J* = 8.4 Hz, 1H). **13C NMR** (101 MHz, DMSO-d6) δ 131.67 (s), 130.12 (s), 130.05 (s), 128.17 (s).

**4-(4-nitrophenyl)-1H-1,2,3-triazole (2f)**[4]

Yellow solid, Isolated yield = 89 %, mp =191-192 °C (Lit190-192)

**1H NMR** (400 MHz, DMSO-d6) δ 8.63 (s, 1H), 8.31 (d, *J* = 8.8 Hz, 2H), 8.14 (d, *J* = 8.8 Hz, 2H). **13C NMR** (101 MHz, DMSO-d6) δ 147.11 (s), 137.47 (s), 126.76 (s), 124.61 – 123.72 (m).

**4-(1H-1,2,3-triazol-4-yl)benzonitrile (2g)**[5]

White solid, Isolated yield = 81 %, mp =170-171 °C (Lit[[5](#_ENREF_5)] 170-172 oC)

**1H NMR** (400 MHz, DMSO-d6) δ 8.39 (s, 1H), 8.03 (d, *J* = 7.8 Hz, 2H), 7.88 (d, *J* = 7.8 Hz, 2H). **13C NMR** (101 MHz, DMSO-d6) δ 133.43 (s), 132.36 (s), 126.72 (s), 126.24 (s), 121.71 (s), 119.24 (s).

**4-(4-methoxyphenyl)-1H-1,2,3-triazole (2h)**[3]

White solid, Isolated yield = 82 %, mp =164-165 °C (Lit164.0-164.8°C)

**1H NMR** (400 MHz, DMSO-d6) δ 8.14 (s, 1H), 7.78 (d, *J* = 8.4 Hz, 2H), 7.00 (d, *J* = 8.4 Hz, 2H), 3.78 (s, 3H). **13C NMR** (101 MHz, DMSO-d6) δ 132.78 (s), 129.61 (s), 116.93 (s), 57.78 (s).

**4-(3,4-dimethoxyphenyl)-1H-1,2,3-triazole (2i)**[2]

Yellow solid, Isolated yield = 79 % mp =102-103 °C (Lit102-104 °C)

**1H NMR** (400 MHz, DMSO-d6) δ 8.06 (s, 1H), 7.85 (s, 1H), 6.60 (t, 2H), 3.85 (s, 3H), 3.75 (s, 3H).

**4-(4-methoxyphenyl)-5-methyl-1H-1,2,3-triazole (2j)**[6]

White solid, Isolated yield = 81 % mp =170-171 °C (Lit169-170 °C)

**1H NMR** (400 MHz, DMSO-d6) δ 7.59 (d, *J* = 8.4 Hz, 2H), 6.99 (d, *J* = 8.3 Hz, 2H), 3.75 (s, 3H), 2.59 – 2.31 (m, 3H). **13C NMR** (101 MHz, DMSO-d6) δ 159.25 (s), 143.61 (s), 139.35 (s), 128.53 (s), 127.91 (s), 124.19 (s), 114.56 (s), 55.58 (s), 11.88 (s).

**5-ethyl-4-phenyl-1H-1,2,3-triazole (2k)**[4]

White solid, Isolated yield = 76 %, mp =100-102 °C(Lit 101-102)

**1H NMR** (400 MHz, DMSO-d6) δ 7.67 (d, *J* = 6.5 Hz, 2H), 7.43 (t, *J* = 7.6 Hz, 2H), 7.33 (d, *J* = 7.1 Hz, 1H), 2.83 (dd, *J* = 7.3 Hz, 2H), 1.21 (t, *J* = 7.5 Hz, 3H). **13C NMR** (101 MHz, DMSO-d6) δ 132.03 (s), 129.14 (s), 127.98 (s), 127.26 (s), 13.57 (s).

**4-(5-methylfuran-2-yl)-1H-1,2,3-triazole (2l)**

White solid, Isolated yield = 89 %, mp =140-141 °C

**1H NMR** (400 MHz, DMSO-d6) δ 7.97 (s, 1H), 6.70 (d, *J* = 2.0 Hz, 1H), 6.19 (s, 1H), 2.22 (s, 3H). **13C NMR** (101 MHz, DMSO-d6) δ 152.29 (s), 144.65 (s), 139.56 (s), 130.30 (s), 108.60 (s), 108.16 (s), 13.74 (s). HRMS (ESI): calc. for [(C7H7N3O)H ] (M+H) 150.0662, measured 150.0652.

**4-(thiophen-2-yl)-1H-1,2,3-triazole (2m)**[4]

White solid, Isolated yield = 83 %, mp =85-87 °C ( Lit 85-87)

**1H NMR** (400 MHz, DMSO-d6) δ 8.20 (s, 1H), 7.48 (d, *J* = 13.8 Hz, 2H), 7.09 (d, *J* = 3.4 Hz, 1H). **13C NMR** (101 MHz, DMSO-d6) δ 128.37 (s), 128.27 (s), 126.18 (s), 125.17 (s).

**4-(naphthalene-2-yl)-1H-1,2,3-triazole (2n)** [4]

White solid, Isolated yield = 84 %, mp =191-192 °C (Lit 190-191)

**1H NMR** (400 MHz, DMSO-d6) δ 8.40 (s, 1H), 8.04 – 7.82 (m, 6H), 7.51 (d, *J* = 6.2 Hz, 2H).**13C NMR** (101 MHz, DMSO-d6) δ 133.56 (s), 128.93 (s), 128.40 (s), 128.12 (s), 124.30 (s).

**5. Copies of 1H and 13C of products**

**4-phenyl-1H-1,2,3-triazole (2a)**


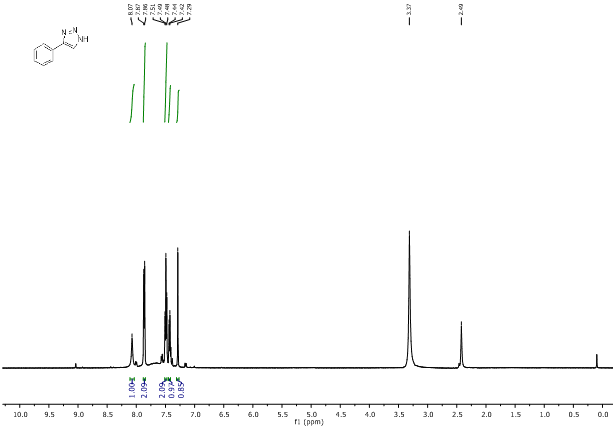


**4-(4-bromophenyl)-1H-1,2,3-triazole (2b)**

**4-(4-chlorophenyl)-1H-1,2,3-triazole (2c)**


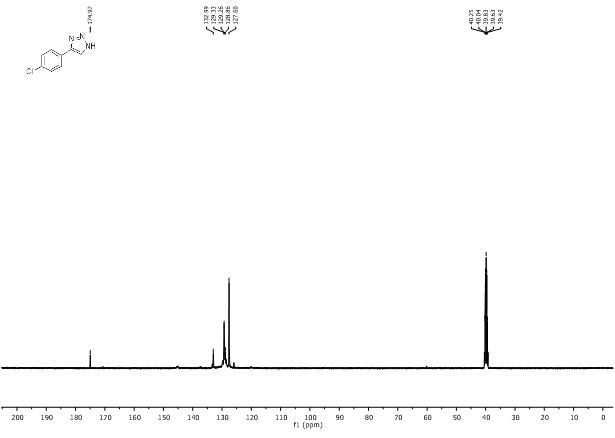


**4-(4-fluorophenyl)-1H-1,2,3-triazole (2d)**

**4-(2,4-dichlorophenyl)-1H-1,2,3-triazole (2e)**

**4-(4-nitrophenyl)-1H-1,2,3-triazole (2f)**

**4-(1H-1,2,3-triazol-4-yl)benzonitrile (2g)**

**4-(4-methoxyphenyl)-1H-1,2,3-triazole (2h)**

**4-(3,4-dimethoxyphenyl)-1H-1,2,3-triazole (2i)**

**4-(4-methoxyphenyl)-5-methyl-1H-1,2,3-triazole (2j)**

**5-ethyl-4-phenyl-1H-1,2,3-triazole (2k)**

**4-(5-methylfuran-2-yl)-1H-1,2,3-triazole (2l)**

**4-(thiophen-2-yl)-1H-1,2,3-triazole (2m)**

**4-(naphthalen-2-yl)-1H-1,2,3-triazole (2n)**

**6. IR Spectra:**

IR Spectra of Fresh Catalyst

IR Spectra of Reaction mixture

**7. References:**

(1) Chaudhari, P. S.; Salim, S. D.; Sawant, R. V.; Akamanchi, K. G. Sulfated tungstate: a new solid heterogeneous catalyst for amide synthesis. *Green Chemistry* **2010**, *12*, 1707-1710. **doi:**10.1039/C0GC00053A

(2) Vergara-Arenas, B. I.; Lomas-Romero, L.; Ángeles-Beltrán, D.; Negrón-Silva, G. E.; Gutiérrez-Carrillo, A.; Lara, V. H.; Morales-Serna, J. A. Multicomponent synthesis of 4-aryl-NH-1,2,3-triazoles in the presence of Al-MCM-41 and sulfated zirconia. *Tetrahedron Letters* **2017**, *58*, 2690-2694.

[**doi:** .org/10.1016/j.tetlet.2017.05.055](https://doi.org/10.1016/j.tetlet.2017.05.055)

(3) Zhang, W.; Kuang, C.; Yang, Q. Palladium-Catalyzed One-Pot Synthesis of 4-Aryl-1H-1,2,3-triazoles from anti-3-Aryl-2,3-dibromopropanoic Acids and Sodium Azide. *Synthesis* **2010**, *2010*, 283-287.

doi: 10.1055/s-0029-1217097

(4) Hui, R.; Zhao, M.; Chen, M.; Ren, Z.; Guan, Z. One‐Pot Synthesis of 4‐Aryl‐NH‐1, 2, 3‐Triazoles through Three‐Component Reaction of Aldehydes, Nitroalkanes and NaN3. *Chinese Journal of Chemistry* **2017**, *35*, 1808-1812.

[doi: .org/10.1002/cjoc.201700367](https://doi.org/10.1002/cjoc.201700367)

(5) Kalisiak, J.; Sharpless, K. B.; Fokin, V. V. Efficient Synthesis of 2-Substituted-1,2,3-triazoles. *Organic Letters* **2008**, *10*, 3171-3174. **doi:**10.1021/ol8006748

(6) Quiclet-Sire, B.; Zard, S. Z. The Synthesis of 1,2,3-Triazoles from Nitroalkenes - Revisited. *Synthesis* **2005**, *2005*, 3319-3326. doi: 10.1055/s-2005-918463
